# Supplementary material for: Frequency and Env determinants of HIV-1 subtype C strains from antiretroviral therapy-naive subjects that display incomplete inhibition by maraviroc
Source: PubMed Central journal article supplement (PMC5093974; doi:10.1186/s12977-016-0309-2), 2016-11-03
Supplement: 12977_2016_309_MOESM1_ESM.pdf [file 12977_2016_309_MOESM1_ESM.pdf]

**Supplementary Table 1. C-HIV Env clones used and their GenBank accession numbers**

| <b>Subject</b>     | <b>Time point<br/>(E=enrolment; I=intermediate; F=final)</b> | <b>Clone<br/>number</b> | <b>GenBank Accession<br/>Number</b> |
|--------------------|--------------------------------------------------------------|-------------------------|-------------------------------------|
| <b>204</b><br>n=13 | E                                                            | 7                       | HQ708023                            |
|                    |                                                              | 10                      | HQ708019                            |
|                    |                                                              | 12                      | HQ708020                            |
|                    |                                                              | 15                      | HQ708021                            |
|                    |                                                              | 17                      | HQ708022                            |
|                    | I                                                            | 6                       | HQ708032                            |
|                    |                                                              | 9                       | HQ708033                            |
|                    |                                                              | 10                      | HQ708031                            |
|                    | F                                                            | 3                       | HQ708025                            |
|                    |                                                              | 4                       | HQ708026                            |
|                    |                                                              | 5                       | HQ708027                            |
|                    |                                                              | 8                       | HQ708029                            |
|                    |                                                              | 10                      | HQ708024                            |
| <b>258</b><br>n=12 | E                                                            | 5                       | HQ708050                            |
|                    |                                                              | 6                       | HQ708051                            |
|                    |                                                              | 20                      | HQ708047                            |
|                    |                                                              | 23                      | HQ708048                            |
|                    | I                                                            | 1                       | HQ708058                            |
|                    |                                                              | 2                       | HQ708059                            |
|                    |                                                              | 6                       | HQ708061                            |
|                    |                                                              | 9                       | HQ708062                            |
|                    | F                                                            | 1                       | HQ708052                            |
|                    |                                                              | 2                       | HQ708053                            |
|                    |                                                              | 20                      | HQ708054                            |
|                    |                                                              | 24                      | HQ708056                            |
| <b>455</b><br>n=16 | E                                                            | 23                      | HQ708063                            |
|                    |                                                              | 24                      | HQ708064                            |
|                    |                                                              | 27                      | HQ708065                            |
|                    |                                                              | 28                      | HQ708066                            |
|                    | I                                                            | 2                       | HQ708073                            |
|                    |                                                              | 3                       | HQ708076                            |
|                    |                                                              | 5                       | HQ708077                            |
|                    |                                                              | 9                       | HQ708078                            |
|                    |                                                              | 22                      | HQ708074                            |
|                    |                                                              | 24                      | HQ708075                            |
|                    | F                                                            | 1                       | HQ708067                            |
|                    |                                                              | 2                       | HQ708068                            |
|                    |                                                              | 5                       | HQ708071                            |
| 9                  |                                                              | HQ708072                |                                     |
| 22                 |                                                              | HQ708069                |                                     |
|                    |                                                              | 23                      | HQ708070                            |

| <b>Subject</b>     | <b>Time point<br/>(E=enrolment; I=intermediate; F=final)</b> | <b>Clone<br/>number</b> | <b>GenBank Accession<br/>Number</b> |
|--------------------|--------------------------------------------------------------|-------------------------|-------------------------------------|
| <b>513</b><br>n=11 | E                                                            | 4                       | HQ708080                            |
|                    |                                                              | 8                       | HQ708081                            |
|                    | I                                                            | 1                       | HQ708089                            |
|                    |                                                              | 5                       | HQ708093                            |
|                    |                                                              | 8                       | HQ708094                            |
|                    |                                                              | 16                      | HQ708090                            |
|                    | F                                                            | 1                       | HQ708082                            |
|                    |                                                              | 4                       | HQ708087                            |
|                    |                                                              | 22                      | HQ708084                            |
|                    |                                                              | 26                      | HQ708085                            |
|                    |                                                              | 27                      | HQ708086                            |
| <b>550</b><br>n=13 | E                                                            | 3                       | HQ708097                            |
|                    |                                                              | 8                       | HQ708098                            |
|                    |                                                              | 13                      | HQ708095                            |
|                    |                                                              | 20                      | HQ708096                            |
|                    | I                                                            | 2                       | HQ708104                            |
|                    |                                                              | 7                       | HQ708108                            |
|                    |                                                              | 30                      | HQ708105                            |
|                    |                                                              | 31                      | HQ708106                            |
|                    |                                                              | 32                      | HQ708107                            |
|                    |                                                              | 32                      | HQ708107                            |
|                    | F                                                            | 1                       | HQ708099                            |
|                    |                                                              | 9                       | HQ708103                            |
|                    |                                                              | 19                      | HQ708100                            |
| 20                 |                                                              | HQ708101                |                                     |
| <b>574</b><br>n=15 | E                                                            | 6                       | HQ708113                            |
|                    |                                                              | 11                      | HQ708109                            |
|                    | I                                                            | 4                       | HQ708126                            |
|                    |                                                              | 12                      | HQ708122                            |
|                    |                                                              | 13                      | HQ708123                            |
|                    |                                                              | 14                      | HQ708124                            |
|                    |                                                              | 15                      | HQ708127                            |
|                    | F                                                            | 1                       | HQ708114                            |
|                    |                                                              | 4                       | HQ708118                            |
|                    |                                                              | 5                       | HQ708119                            |
|                    |                                                              | 6                       | HQ708120                            |
|                    |                                                              | 8                       | HQ708121                            |
|                    |                                                              | 10                      | HQ708115                            |
|                    |                                                              | 12                      | HQ708116                            |
|                    |                                                              | 15                      | HQ708117                            |
| <b>805</b><br>n=7  | E                                                            | 15                      | HQ708127                            |
|                    |                                                              | 29                      | HQ708128                            |
|                    |                                                              | 31                      | HQ708129                            |
|                    | I                                                            | 2                       | HQ708130                            |
|                    |                                                              | 7                       | HQ708132                            |
|                    |                                                              | 8                       | HQ708133                            |
|                    |                                                              | 34                      | HQ708131                            |

| Subject             | Time point<br>(E=enrolment; I=intermediate; F=final) | Clone<br>number | GenBank Accession<br>Number |
|---------------------|------------------------------------------------------|-----------------|-----------------------------|
| <b>858</b><br>n=17  | E                                                    | 1               | HQ708135                    |
|                     |                                                      | 2               | HQ708136                    |
|                     |                                                      | 4               | HQ708141                    |
|                     |                                                      | 8               | HQ708142                    |
|                     |                                                      | 22              | HQ708137                    |
|                     |                                                      | 23              | HQ708138                    |
|                     |                                                      | 38              | HQ708140                    |
|                     | I                                                    | 1               | HQ708149                    |
|                     |                                                      | 5               | HQ708152                    |
|                     |                                                      | 8               | HQ708154                    |
|                     |                                                      | 10              | HQ708150                    |
|                     |                                                      | 20              | HQ708151                    |
|                     | F                                                    | 3               | HQ708146                    |
|                     |                                                      | 6               | HQ708147                    |
|                     |                                                      | 9               | HQ708148                    |
|                     |                                                      | 21              | HQ708134                    |
|                     |                                                      | 26              | HQ708144                    |
| <b>1109</b><br>n=7  | E                                                    | 42              | HQ707834                    |
|                     |                                                      | 43              | HQ707835                    |
|                     |                                                      | 46              | HQ707836                    |
|                     |                                                      | 49              | HQ707837                    |
|                     | I                                                    | 9               | HQ707849                    |
|                     |                                                      | 10              | HQ707844                    |
|                     |                                                      | 19              | HQ707847                    |
| <b>1114</b><br>n=14 | E                                                    | 1               | HQ707850                    |
|                     |                                                      | 8               | HQ707854                    |
|                     |                                                      | 9               | HQ707855                    |
|                     |                                                      | 10              | HQ707851                    |
|                     | I                                                    | 1               | HQ707861                    |
|                     |                                                      | 4               | HQ707863                    |
|                     |                                                      | 5               | HQ707864                    |
|                     |                                                      | 6               | HQ707865                    |
|                     |                                                      | 8               | HQ707866                    |
|                     |                                                      | 10              | HQ707862                    |
|                     | F                                                    | 17              | HQ707856                    |
|                     |                                                      | 18              | HQ707857                    |
|                     |                                                      | 19              | HQ707858                    |
|                     |                                                      | 33              | HQ707859                    |
| <b>1136</b><br>n=12 | E                                                    | 1               | HQ707867                    |
|                     |                                                      | 4               | HQ707870                    |
|                     |                                                      | 11              | HQ707868                    |
|                     |                                                      | 12              | HQ707869                    |
|                     | I                                                    | 3               | HQ707880                    |
|                     |                                                      | 10              | HQ707877                    |
|                     |                                                      | 11              | HQ707878                    |
|                     |                                                      | 12              | HQ707879                    |
|                     | F                                                    | 7               | HQ707876                    |
|                     |                                                      | 11              | HQ707871                    |
|                     |                                                      | 12              | HQ707872                    |
|                     |                                                      | 12              | HQ707872                    |
|                     |                                                      | 13              | HQ707873                    |

| <b>Subject</b>      | <b>Time point<br/>(E=enrolment; I=intermediate; F=final)</b> | <b>Clone<br/>number</b> | <b>GenBank Accession<br/>Number</b> |   |          |
|---------------------|--------------------------------------------------------------|-------------------------|-------------------------------------|---|----------|
| <b>1375</b><br>n=11 | E                                                            | 2                       | HQ707882                            |   |          |
|                     |                                                              | 3                       | HQ707885                            |   |          |
|                     |                                                              | 5                       | HQ707886                            |   |          |
|                     |                                                              | 20                      | HQ707883                            |   |          |
|                     |                                                              | 21                      | HQ707884                            |   |          |
|                     | I                                                            | 2                       | HQ707892                            |   |          |
|                     |                                                              | 3                       | HQ707893                            |   |          |
|                     |                                                              | 8                       | HQ707895                            |   |          |
|                     |                                                              | 9                       | HQ707896                            |   |          |
|                     | F                                                            | 13                      | HQ707888                            |   |          |
| 20                  |                                                              | HQ707889                |                                     |   |          |
| <b>1408</b><br>n=11 | E                                                            | 30                      | HQ707897                            |   |          |
|                     |                                                              | 31                      | HQ707898                            |   |          |
|                     |                                                              | 33                      | HQ707899                            |   |          |
|                     |                                                              | 35                      | HQ707901                            |   |          |
|                     |                                                              | 40                      | HQ707902                            |   |          |
|                     | I                                                            | 31                      | HQ707904                            |   |          |
|                     |                                                              | 33                      | HQ707905                            |   |          |
|                     |                                                              | 34                      | HQ707906                            |   |          |
|                     |                                                              | 36                      | HQ707908                            |   |          |
|                     |                                                              | 37                      | HQ707909                            |   |          |
|                     |                                                              | 38                      | HQ707910                            |   |          |
|                     |                                                              | <b>1441</b><br>n=12     | E                                   | 1 | HQ707911 |
|                     |                                                              |                         |                                     | 2 | HQ707912 |
|                     |                                                              |                         |                                     | 6 | HQ707915 |
| 7                   | HQ707916                                                     |                         |                                     |   |          |
| I                   | 2                                                            |                         | HQ707921                            |   |          |
|                     | 3                                                            |                         | HQ707922                            |   |          |
|                     | 8                                                            |                         | HQ707923                            |   |          |
| F                   | 9                                                            | HQ707924                |                                     |   |          |
|                     | 20                                                           | HQ707917                |                                     |   |          |
|                     | 24                                                           | HQ707918                |                                     |   |          |
|                     | 28                                                           | HQ707919                |                                     |   |          |
| <b>1503</b><br>n=11 | E                                                            | 11                      | HQ707925                            |   |          |
|                     |                                                              | 13                      | HQ707926                            |   |          |
|                     |                                                              | 22                      | HQ707928                            |   |          |
|                     | I                                                            | 7                       | HQ707943                            |   |          |
|                     |                                                              | 11                      | HQ707939                            |   |          |
|                     |                                                              | 13                      | HQ707940                            |   |          |
|                     |                                                              | 27                      | HQ707942                            |   |          |
|                     |                                                              | 7                       | HQ707935                            |   |          |
|                     | F                                                            | 9                       | HQ707937                            |   |          |
|                     |                                                              | 40                      | HQ707931                            |   |          |
|                     |                                                              | 43                      | HQ707933                            |   |          |

| <b>Subject</b>      | <b>Time point<br/>(E=enrolment; I=intermediate; F=final)</b> | <b>Clone<br/>number</b> | <b>GenBank Accession<br/>Number</b> |
|---------------------|--------------------------------------------------------------|-------------------------|-------------------------------------|
| <b>1554</b><br>n=13 | E                                                            | 2                       | HQ707945                            |
|                     |                                                              | 3                       | HQ707946                            |
|                     |                                                              | 8                       | HQ707950                            |
|                     |                                                              | 10                      | HQ707944                            |
|                     | I                                                            | 6                       | HQ707959                            |
|                     |                                                              | 7                       | HQ707960                            |
|                     |                                                              | 8                       | HQ707961                            |
|                     | F                                                            | 4                       | HQ707956                            |
|                     |                                                              | 8                       | HQ707957                            |
|                     |                                                              | 10                      | HQ707951                            |
|                     |                                                              | 25                      | HQ707952                            |
|                     |                                                              | 26                      | HQ707953                            |
|                     |                                                              | 29                      | HQ707954                            |
| <b>1684</b><br>n=10 | E                                                            | 7                       | HQ707965                            |
|                     |                                                              | 9                       | HQ707966                            |
|                     |                                                              | 19                      | HQ707963                            |
|                     | I                                                            | 13                      | HQ707972                            |
|                     |                                                              | 26                      | HQ707973                            |
|                     |                                                              | 29                      | HQ707974                            |
|                     |                                                              | 30                      | HQ707975                            |
|                     | F                                                            | 8                       | HQ707971                            |
|                     |                                                              | 17                      | HQ707968                            |
|                     |                                                              | 22                      | HQ707969                            |
| <b>1689</b><br>n=10 | E                                                            | 6                       | HQ707977                            |
|                     |                                                              | 8                       | HQ707978                            |
|                     |                                                              | 9                       | HQ707979                            |
|                     | I                                                            | 24                      | HQ707985                            |
|                     |                                                              | 25                      | HQ707986                            |
|                     |                                                              | 26                      | HQ707987                            |
|                     |                                                              | 28                      | HQ707988                            |
|                     | F                                                            | 2                       | HQ707980                            |
|                     |                                                              | 5                       | HQ707983                            |
|                     |                                                              | 26                      | HQ707982                            |
| <b>1854</b><br>n=14 | E                                                            | 5                       | HQ707991                            |
|                     |                                                              | 8                       | HQ707992                            |
|                     |                                                              | 10                      | HQ707990                            |
|                     | I                                                            | 3                       | HQ708001                            |
|                     |                                                              | 4                       | HQ708002                            |
|                     |                                                              | 6                       | HQ708005                            |
|                     |                                                              | 7                       | HQ708006                            |
|                     |                                                              | 20                      | HQ708000                            |
|                     | F                                                            | 6                       | HQ707998                            |
|                     |                                                              | 8                       | HQ707999                            |
|                     |                                                              | 14                      | HQ707993                            |
|                     |                                                              | 17                      | HQ707994                            |
|                     |                                                              | 18                      | HQ707995                            |
|                     |                                                              | 21                      | HQ707996                            |

| <b>Subject</b>      | <b>Time point<br/>(E=enrolment; I=intermediate; F=final)</b> | <b>Clone<br/>number</b> | <b>GenBank Accession<br/>Number</b> |
|---------------------|--------------------------------------------------------------|-------------------------|-------------------------------------|
| <b>2042</b><br>n=11 | E                                                            | 15                      | HQ708007                            |
|                     |                                                              | 18                      | HQ708008                            |
|                     |                                                              | 26                      | HQ708009                            |
|                     | I                                                            | 13                      | HQ708014                            |
|                     |                                                              | 21                      | HQ708015                            |
|                     |                                                              | 27                      | HQ708016                            |
|                     |                                                              | 38                      | HQ708017                            |
|                     | F                                                            | 24                      | HQ708010                            |
|                     |                                                              | 25                      | HQ708011                            |
|                     |                                                              | 26                      | HQ708012                            |
|                     |                                                              | 28                      | HQ708013                            |
| <b>2253</b><br>n=9  | E                                                            | 21                      | HQ708037                            |
|                     |                                                              | 22                      | HQ708038                            |
|                     | I                                                            | 21                      | HQ708041                            |
|                     |                                                              | 23                      | HQ708043                            |
|                     |                                                              | 27                      | HQ708044                            |
|                     |                                                              | 28                      | HQ708045                            |
|                     |                                                              | 32                      | HQ708046                            |
|                     | F                                                            | 29                      | HQ708035                            |
|                     |                                                              | 36                      | HQ708036                            |
