# Supplementary material for: Frequency and Env determinants of HIV-1 subtype C strains from antiretroviral therapy-naive subjects that display incomplete inhibition by maraviroc
Source: PubMed Central journal article supplement (PMC5093974; doi:10.1186/s12977-016-0309-2), 2016-11-03
Supplement: 12977_2016_309_MOESM2_ESM.pdf [file 12977_2016_309_MOESM2_ESM.pdf]

**Supplementary Table 2. Alternative coreceptor usage of Envs displaying incomplete HIV-1 inhibition by MVC compared to a representative Env from each subject that displays complete inhibition**

| Patient ID | Env clone |      | Coreceptor usage |      |       |      |
|------------|-----------|------|------------------|------|-------|------|
|            | T         | #    | CCR5             | CCR3 | FPRL1 | CCR8 |
| 204        | E-15      | Sens | ++               | -    | ++    | -    |
|            | E-7       | Res  | ++               | +    | ++    | -    |
| 550        | I-32      | Sens | +++              | -    | +++   | -    |
|            | I-2       | Res  | +++              | +++  | +++   | -    |
|            | I-7       | Res  | +++              | +++  | +++   | -    |
|            | F-12      | Res  | +++              | +++  | +++   | -    |
|            | F-20      | Res  | +++              | ++   | +++   | -    |
| 1375       | E-21      | Sens | +++              | -    | +++   | +    |
|            | E-2       | Res  | +++              | +    | +++   | ++   |
|            | I-8       | Res  | +++              | +    | +++   | +    |
| 1441       | E-7       | Sens | +++              | -    | ++    | -    |
|            | E-1       | Res  | +++              | -    | ++    | +    |
|            | E-2       | Res  | +++              | -    | ++    | +    |
|            | E-6       | Res  | +++              | +    | +++   | +    |
|            | I-2       | Res  | +++              | +    | ++    | ++   |
|            | I-9       | Res  | +++              | +    | +++   | ++   |
| 1503       | E-11      | Sens | +++              | -    | -     | -    |
|            | F-7       | Res  | +++              | -    | -     | -    |
| 1684       | I-13      | Sens | ++               | +    | ++    | -    |
|            | E-7       | Res  | +++              | ++   | +++   | +    |
| 1854       | E-8       | Sens | +++              | ++   | +++   | ++   |
|            | I-7       | Res  | +++              | ++   | +     | -    |
| 2042       | E-26      | Sens | +++              | -    | ++    | -    |
|            | I-38      | Res  | ++               | +    | ++    | -    |

The level of virus entry into NP2-CD4 cells expressing CCR3, FPRL1 or CCR8 was scored as - (<5 fold above background), + (5-50 fold above background), ++ (50-300 fold above background), or +++ (>300 fold above background). These data were sourced and are described in detail in a previous study (Cashin et al., *Retrovirology*, 2013, 10:98). The results for virus entry into NP2-CD4 cells expressing CCR5, using equivalent infectious units of virus inoculum, are shown alongside these data for comparison. E, I and F refer to Envs cloned from plasma obtained at study enrolment, approximately 1 year later (intermediate), and approximately 3 years after enrolment (final), respectively. Sens; Envs that are completely inhibited by MVC. Res; Envs that display incomplete inhibition by MVC.
